# Supplementary material
Source: ML conference proceedings conference paper supplement (https://openreview.net/forum?id=Bh4lBPUjqg9)

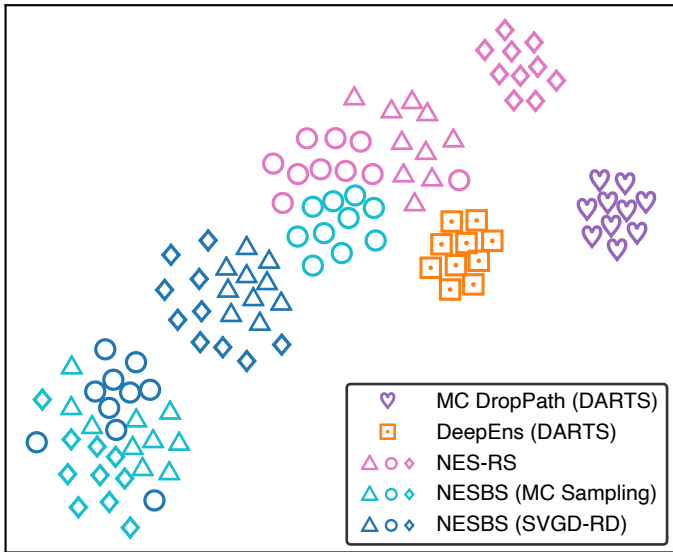

Supplement: supplementary_material [file attachment]

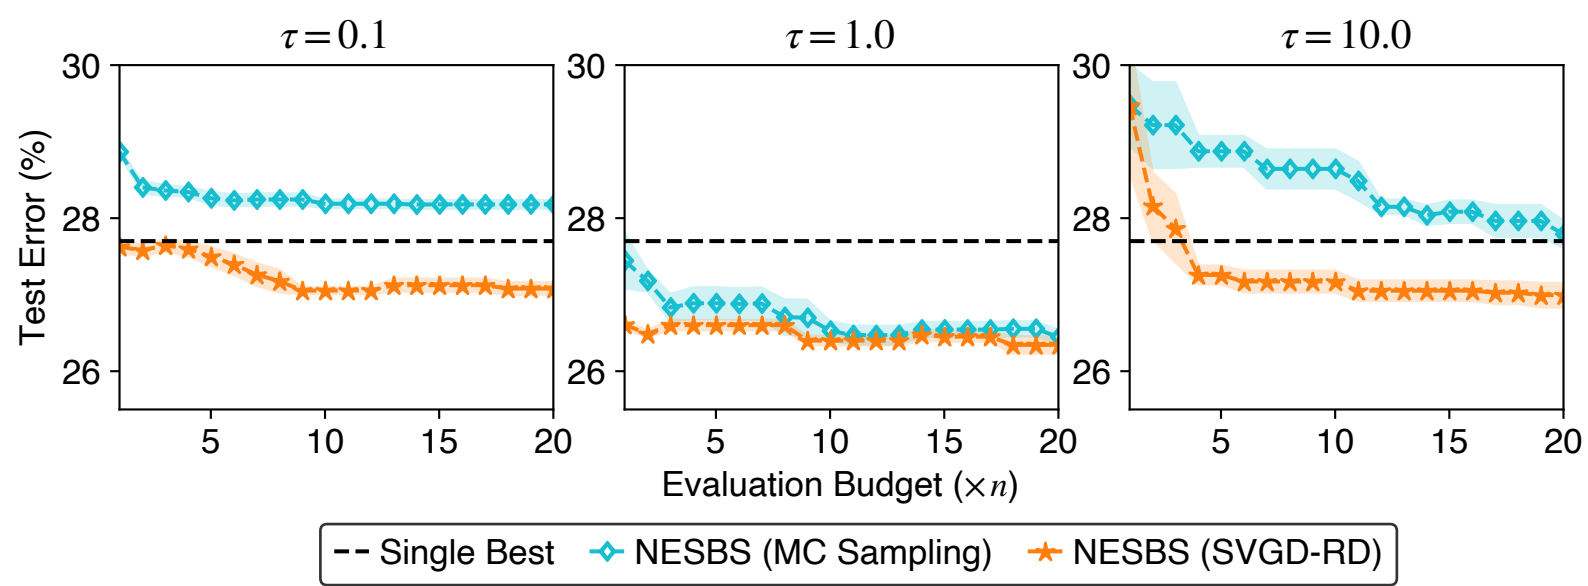

Supplement: supplementary_material [file attachment]

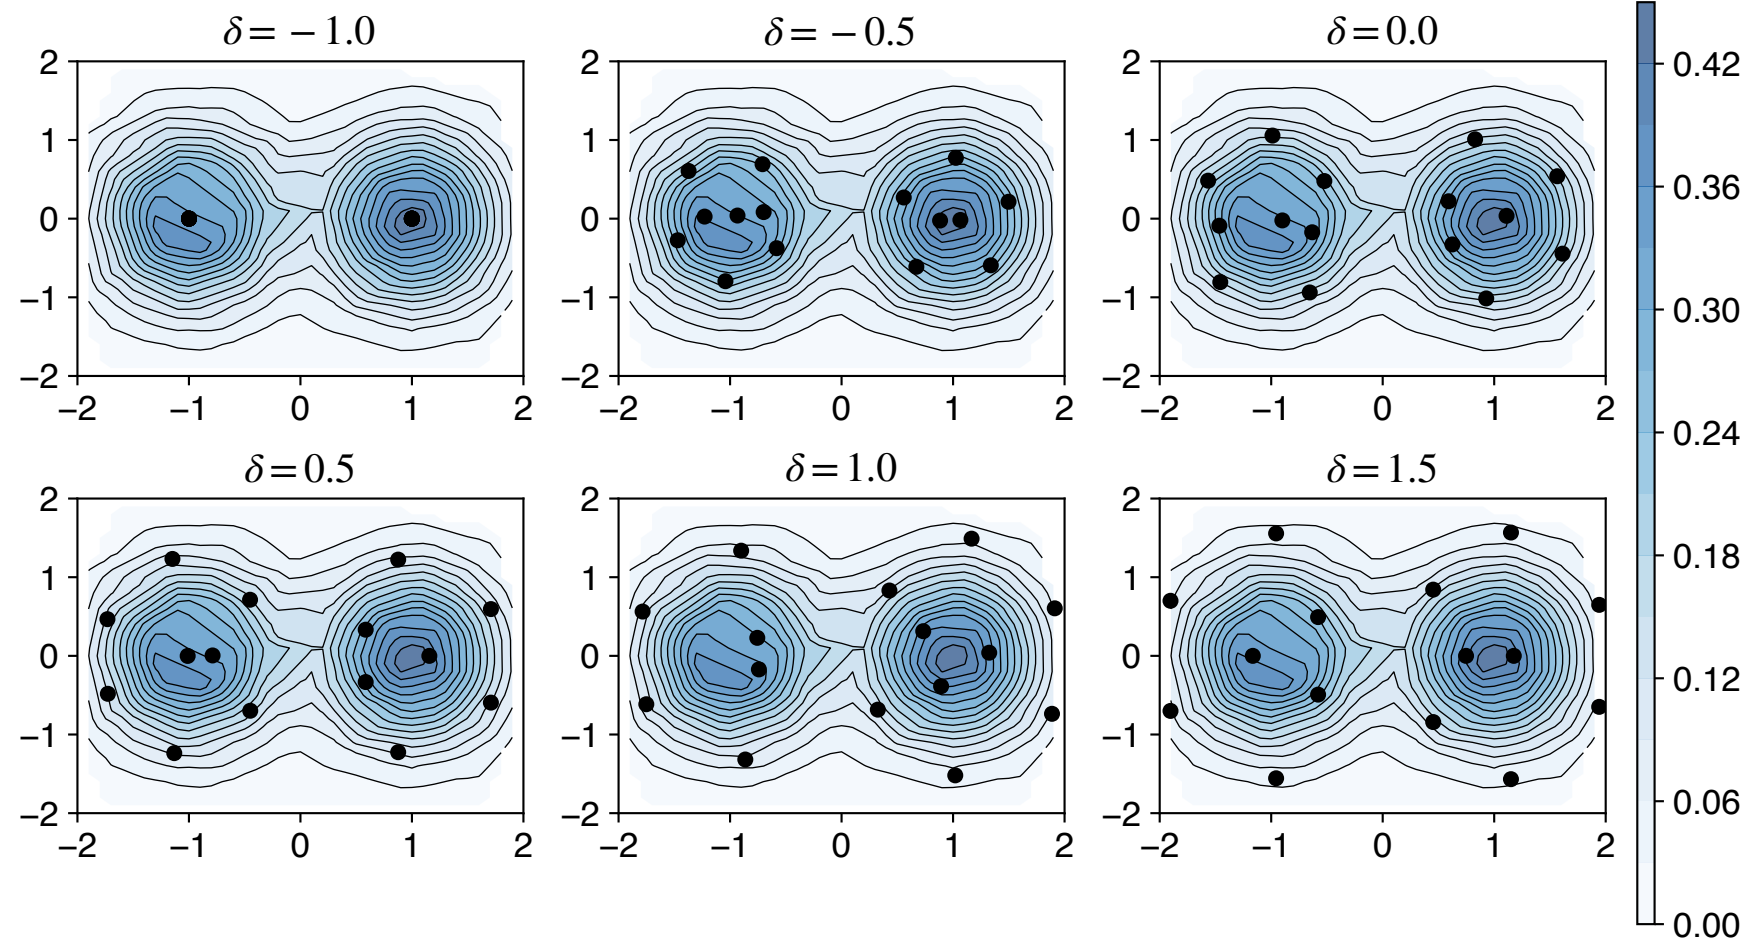

Supplement: supplementary_material [file attachment]

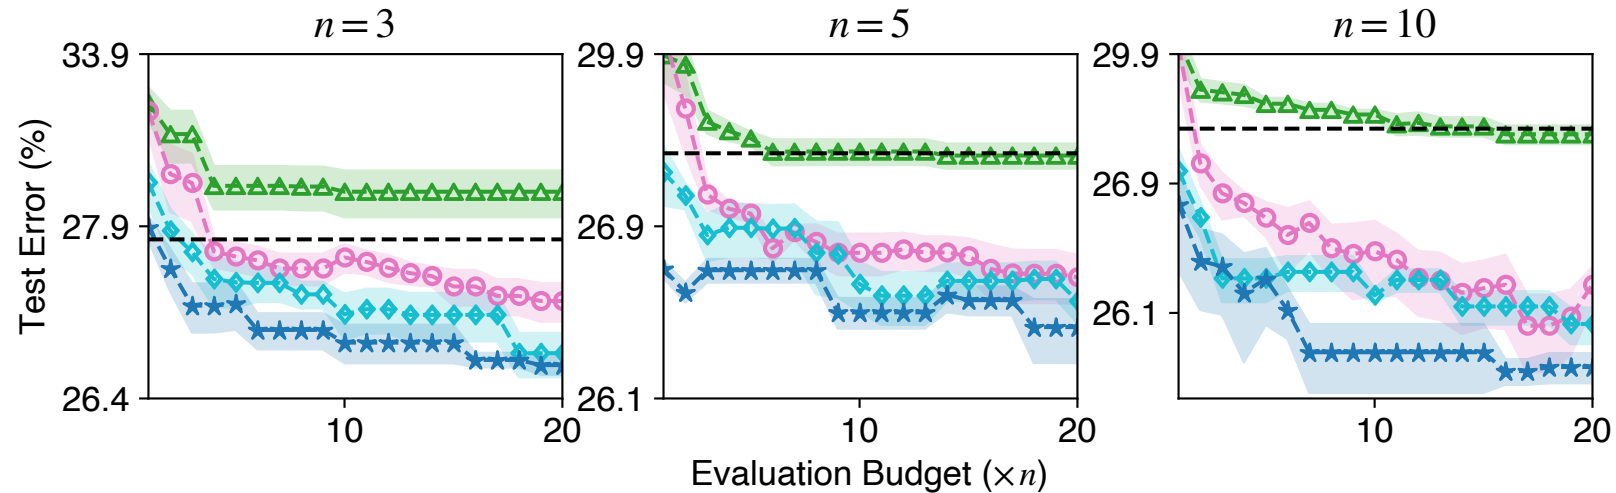

-- Single Best    $\triangle$  URS    $\circ$  NES-RS    $\diamond$  NESBS (MC Sampling)    $\star$  NESBS (SVGD-RD)

Supplement: supplementary_material [file attachment]

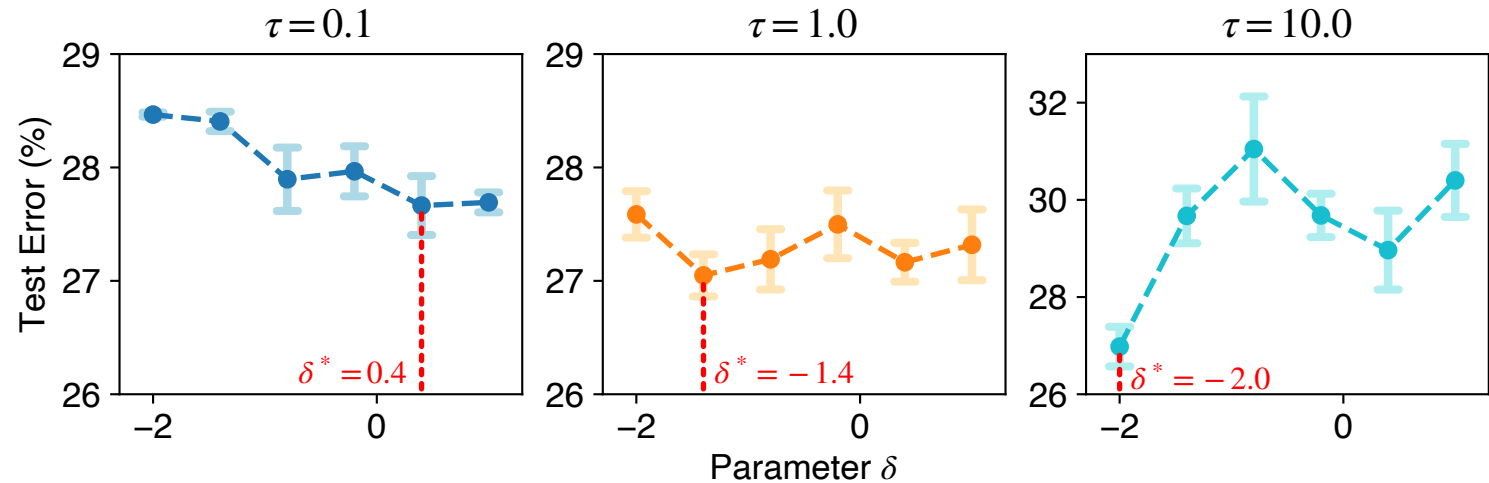

Supplement: supplementary_material [file attachment]

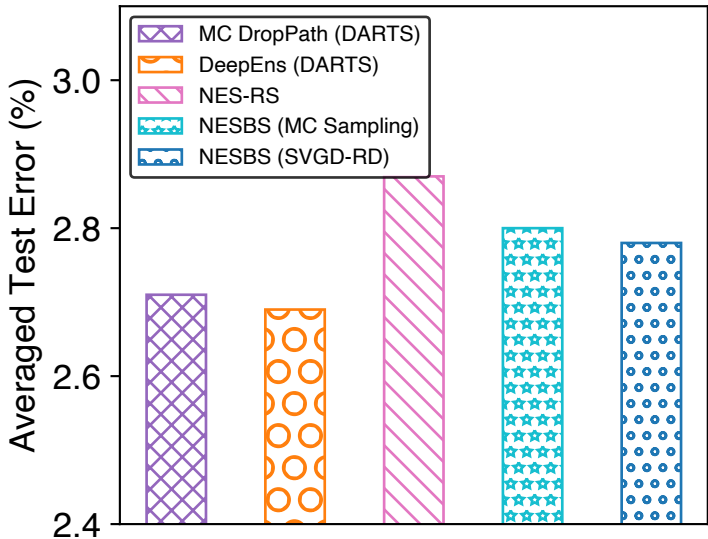

Supplement: supplementary_material [file attachment]

Supernet

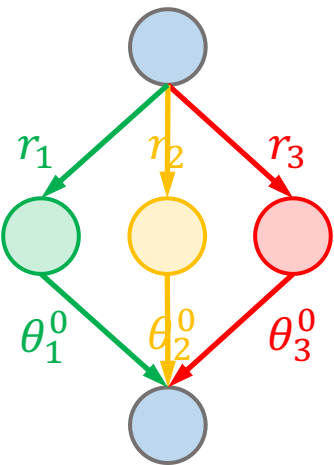

Sampled Architectures during Training

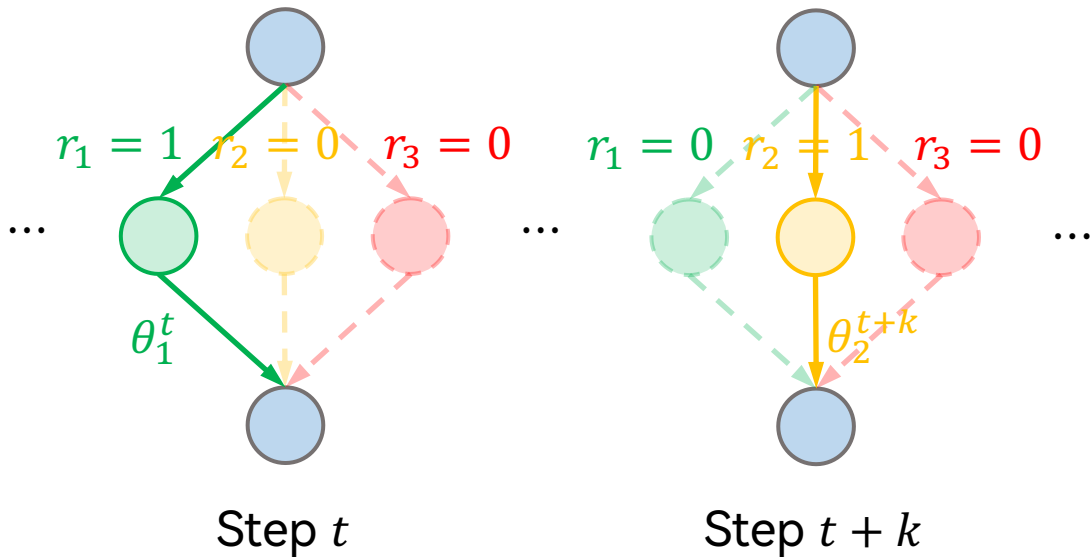

Supplement: supplementary_material [file attachment]

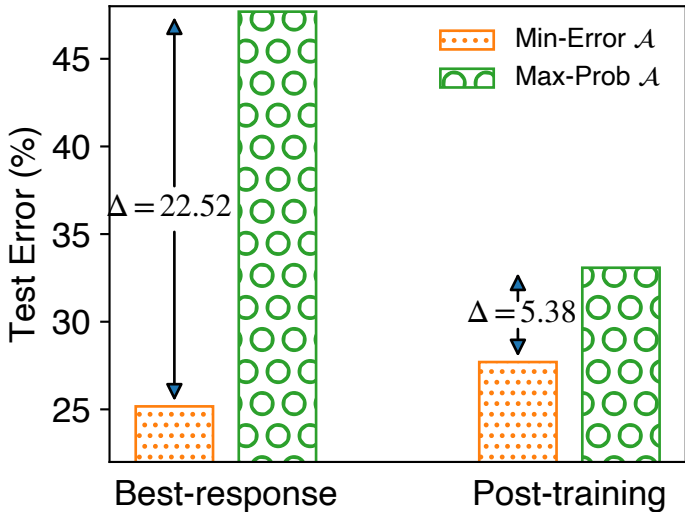

Supplement: supplementary_material [file attachment]
